# Supplementary material
Source: PubMed Central journal article supplement (PMC3701432)
Supplement: NIHMS484465-supplement-SOM.pdf [file NIHMS484465-supplement-SOM.pdf]

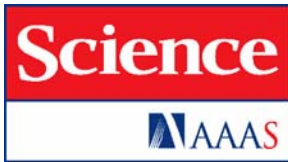

## Supporting Online Material for

### **Aberrant Overexpression of Satellite Repeats in Pancreatic and Other Epithelial Cancers**

David T. Ting, Doron Lipson, Suchismita Paul, Brian W. Brannigan, Sara Akhavanfard, Erik J. Coffman, Gianmarco Contino, Vikram Deshpande, A. John Iafrate, Stan Letovsky, Miguel N. Rivera, Nabeel Bardeesy, Shyamala Maheswaran, Daniel A. Haber\*

\*To whom correspondence should be addressed. E-mail: [haber@helix.mgh.harvard.edu](mailto:haber@helix.mgh.harvard.edu)

Published 13 January 2011 on *Science Express*  
DOI: 10.1126/science.1200801

#### **This PDF file includes:**

Materials and Methods  
SOM Text  
Figs. S1 to S7  
Tables S1 to S10  
References

## **MATERIALS AND METHODS**

### **Tissues and Cell lines**

Mice with pancreatic cancer of different genotypes were bred as previously described in the Bardeesy laboratory (*S1*). Normal wild type mice were purchased from Jackson laboratories. Animals were euthanized as per animal protocol guidelines. Pancreatic tumors and normal tissue were extracted sterilely and then flash frozen with liquid nitrogen. Tissues were stored at -80° C. Additional normal total RNA was purchased from Clontech (Mouse Total RNA Master Panel). Cell lines were generated fresh for animals as previously described (*S2*) and established cell lines were cultured in RPMI-1640 + 10% FBS + 1% Pen/Strep (Gibco/Invitrogen). Cell lines treated with 5-azacytidine (AZA) was done at a concentration of 10  $\mu$ M for 48 hrs before RNA extraction. Additional mouse tumors from colon and lung were generously provided by Kevin M. Haigis (Massachusetts General Hospital) and Kwok-Kin Wong (Dana-Farber Cancer Institute).

Human pancreatic tumor tissues were obtained by V. Deshpande as excess discarded human material per IRB protocol from the Massachusetts General Hospital. Additional pancreatic, lung, renal, ovarian, and prostate tumors were obtained from the Massachusetts General Hospital Tissue Bank Repository. Gross tumor was excised and fresh frozen in liquid nitrogen prior to nucleic acid extraction. Two independent normal human pancreatic tissue total RNAs were obtained from Clontech and Ambion. Other normal human tissue RNA was obtained from commercial vendors, Clontech (Human Total RNA Master Panel II).

### **Nucleic Acid Preparation**

Fresh frozen tissue was pulverized with a sterile pestle in a microfuge tube on dry ice. Cell lines were cultured and fresh frozen in liquid nitrogen prior to nucleic acid extraction. RNA and DNA from cell lines and fresh frozen tumor and normal tissues were all processed in the same manner. RNA was extracted using the TRIzol<sup>®</sup> Reagent (Invitrogen) per manufacturer's specifications. DNA from tissue and cell lines was extracted using the QIAamp Mini Kit (QIAGEN) per manufacturer's protocol.

### **Single Molecule Sequencing and Data Processing**

Purified RNA was subjected to Digital Gene Expression (DGE) sample prepping and analysis on the HeliScope<sup>™</sup> Single Molecule Sequencer from Helicos BioSciences. This method has been previously described (*S3*). Briefly, Single stranded cDNA was reverse transcribed from RNA with a dTU25V primer and the Superscript III cDNA synthesis kit (Invitrogen). RNA was digested and single stranded cDNA was purified using a solid phase reversible immobilization (SPRI) technique with Agencourt<sup>®</sup> AMPure<sup>®</sup> magnetic beads. Single stranded cDNA was denatured and then a poly-A tail was added to the 3' end using terminal transferase (New England Biolabs).

Purified DNA was subjected to the DNA sequencing sample prepping protocol from Helicos that has been previously described (*S4*). Briefly, genomic DNA was sheared with a Covaris S2 acoustic sonicator producing fragments averaging 200 bps and ranging from 100-500 bps. Sheared DNA was then cleaned

with SPRI. DNA was then denatured and a poly-A tail was added to the 3' end using terminal transferase.

Tailed cDNA or DNA were then hybridized to the sequencing flow cell followed by "Fill and Lock" and single molecule sequencing. Sequence reads were subjected to filtering for a minimum read length of 25 and removal of artifact read followed by alignment to the known human or mouse transcriptome libraries (UCSC knownGene database +rRNA sequences) using the indexDPgenomic aligner (*S3*). Genomic DNA sequence reads were aligned to the human (UCSC hg18) or mouse (UCSC mm9) genomes and counted to determine copy number of the major mouse satellite.

### **Northern Blot Analysis**

Northern blot probe for major mouse satellite was generated by performing PCR of genomic DNA around a 788 bp tandem array insertion of the mouse major satellite at chromosome 2: 98506702:98507489 (Build: UCSC mm9). Primers used had the following sequences:

Forward: CGTTTCCAACGAATGTGTTT at chr2: 98506541-9850650

Reverse: TGGAAACAGATGATTTTCGTC at chr2: 98507480-98507499

The resulting PCR product was approximately 958 bp. The PCR product was then cloned with the TOPO® TA Cloning Dual Promoter Kit (Invitrogen) per protocol.

Northern blot was performed using the NorthernMax-Gly Kit (Ambion). Total RNA (10 ug) was mixed with equal volume of Glyoxal Load Dye (Ambion) and incubated at 50°C for 30 min. After electrophoresis in a 1% agarose gel, RNA was transferred onto BrightStar-Plus membranes (Ambion) and crosslinked with ultraviolet light. The membrane was prehybridized in ULTRAhyb buffer (Ambion) at 68°C for 30 min. The mouse RNA probe (1100 bp) was generated from the pCRII-TOPO vector in both sense (T7) and anti-sense directions (SP6) using the MAXIscript Kit (Ambion). The RNA probe was then nonisotopically labeled using the BrightStar Psoralen-Biotin Kit (Ambion) according to the manufacturer's instructions. Using 0.1 nM probe, the membrane was hybridized in ULTRAhyb buffer (Ambion) at 68°C for 2 hours. The membrane was washed with a Low Stringency wash at room temperature for 10 min, followed by two High Stringency washes at 68°C for 15 min. For nonisotopic chemiluminescent detection, the BrightStar BioDetect Kit was used according to the manufacturer's instructions.

### **RNA *in situ* hybridization**

Formalin Fixed Paraffin Embedded (FFPE) tissue from human and mouse was prepared per standard protocol by the Massachusetts General Hospital Clinical and Research Pathology Cores. Human FFPE tissues were selected by V. Deshpande according to IRB protocols. Pancreatic tissue FFPE cases were all obtained retrospectively. We note that samples were not collected with the intent for RNA-ISH and that there is variability in nucleic acid preservation.

For mouse tissues, ISH was performed using standard protocols. Briefly, dissected tissues were fixed in 4% paraformaldehyde and embedded in paraffin blocks. 8 micron sections were deparaffinized and digested with pepsin (Digest-All 3, Invitrogen), treated with acetic anhydride and dehydrated with ethanol. Sections were hybridized overnight with sense and anti-sense digoxigenin labeled probes prepared with the DIG RNA Labeling Kit (Roche). Since transcript was found in both sense and antisense directions, a probe against WT1 was used as a negative control. Bound probes were detected using an

alkaline phosphatase conjugated anti-digoxigenin antibody (Roche) and BM purple (Roche). Counter stain applied was nuclear fast red (Vector laboratories). The probe used is the same used for northern blot analysis as above. Images were taken with an Olympus BX60 scope with color camera.

For human tissues, ISH was performed using Panomics protocols. 5 micron sections were cut, fixed in 10% formaldehyde (Fisher Scientific, Pittsburgh, PA), deparaffinized, boiled in pre-treatment solution (Affymetrix, Santa Clara, CA) and digested with proteinase K (Affymetrix, Santa Clara, CA). Sections were hybridized for 3hour at 40° with a custom designed Panomics QuantiGene ViewRNA probe against the HSATII satellite (Affymetrix, Santa Clara, CA). Bound probes were then amplified per protocol from Panomics using PreAmp and Amp molecules. Multiple Label Probe oligonucleotides conjugated to alkaline phosphatase (LP-AP) are then added and Fast Red Substrate is used to produce signal (red dots). Slides are then counterstained with Hematoxylin. Serial sections were also subjected to Hematoxylin & Eosin staining per standard histology protocol. Images were taken by a Nikon 90i scope with color camera.

### **Gene Expression and Satellite Expression Profiling**

All mouse sample reads were aligned to a custom made library for the mouse major satellite (Sequence from UCSC genome browser). Human samples were aligned to a custom made reference library for all satellite repeats and LINE-1 variants generated from the Repbase library (S5). Reads aligning to the satellite repeat reference were counted and their fraction of the total number of genome aligned reads was determined. In addition, gene expression counts were determined based on alignments to the annotated human/mouse transcriptomes based on a statistical gene counting method (S3). Gene counts were normalized per million aligned genomic reads for all samples.

For linear correlation of mouse major satellite and human alpha (ALR) satellite to transcriptome we performed a linear regression analysis of the normalized expression levels of each gene across all tissues vs the measured satellite expression level. Genes were then ranked according to decreasing Pearson coefficient for linear regression, and a set of highly-correlating genes ( $R > 0.85$ ) was selected for further analysis.

### **Gene Categorization**

Linearly correlated genes with  $R > 0.85$  were mapped using the DAVID program (S6, S7). These genes were then analyzed with the Functional Annotation clustering program and the UP\_TISSUE database to classify each of these mapped genes. Germ/Stem cell genes included genes expressed highly in testis, egg, trophoblast, and neural stem cells. Neural genes included genes expressed highly in brain, spinal cord, and specialized sensory neurons including olfactory, auditory, and visual perception. Zinc Finger proteins were classified using the INTERPRO database.

### **Genomic proximity of LINE-1**

The transcriptional start sites for all mouse genes were determined (UCSC knownGene database) as well as the position of all LINE-1 elements in the mouse and human genomes with a minimum of 1 Kbp in length (UCSC RepeatMasker database). For all genes with a minimum average expression level of 1 transcripts per million, the distance to the closest upstream LINE-1 element was calculated. Focusing on the top satellite correlated genes (SCG;  $R > 0.85$ ), we calculated the frequency of these genes from the

total gene set as a function of the distance from the closest upstream LINE-1 element. Enrichment factor and p-value according to Fisher's Exact test were calculated at a distance of 10 Kbp.

### **Immunohistochemistry for Chromogranin A**

Immunohistochemistry for mouse tumor and normal tissue sections was performed using standard protocols with an anti-Chromogranin A antibody (Abcam ab45138, 1:200). Briefly, sections were deparaffinized using Xylene for 30 minutes and antigen retrieval was performed using Borg Decloaking solution in a Decloaking Chamber (Biocare Medical). Tissues were incubated with primary antibodies for 2 hours and with secondary antibodies for 1 hour at room temperature. Signals were detected using the ABC kit for immunoperoxidase staining (Vector laboratories). Images were taken by a Nikon 90i scope with color camera.

### **Human neuroendocrine marker targeted differential expression analysis**

A targeted gene expression analysis of known neuroendocrine was carried out in human PDAC samples. Human tumors were separated into high vs low ALR satellite levels using the median satellite expression. A total of 12 genes were evaluated between high and low satellite tumors and fold change was calculated. Analysis of the population means was compared using the 2-tailed student t-test assuming unequal variance and p-values were corrected to q-values using the Storey method (S8). Genes that had q-values < 0.05 were considered significant candidates.

### **Histone modifiers targeted differential expression analysis**

A targeted gene expression analysis of demethylases, methyltransferases, acetyltransferases, and deacetylases was carried out in mouse and human PDAC samples. A list of these modifiers was obtained from three recent (S9-S11). Mouse PDACs with *Kras*<sup>G12D</sup> and *Tp53* loss and all human PDACs were used for this analysis. Mouse and human tumors were separated into high vs low satellite levels using the median satellite expression (Mouse major: 56,081 tpm and Human ALR: 13,428 tpm). A total of 99 genes were evaluated between high and low satellite tumors and fold change was calculated. Analysis of the population means was compared using the 2-tailed student t-test assuming unequal variance and p-values were corrected to q-values using the Storey method (S8). Genes that had q-values < 0.10 were considered significant candidates.

## SUPPLEMENTARY TEXT

### **Presence of specific mouse and human satellite sequences in parasitic genomes.**

BLAST sequence matching of overexpressed mouse tumor satellites first identified multiple independent sequences (max identity of >95% , 100% coverage, E-score <  $2 \times 10^{-176}$ ) in three murine malaria strains (*Plasmodium berghei* (461 hits), *Plasmodium yoelii yoelii* (69 hits), and *Plasmodium chabaudi chabaudi* (44 hits)), as well as the parasitic trematode *Schistosoma mansoni* (20 hits). Similarly, BLAST analysis demonstrated presence of the human satellite HSAT6 (72-85% max identity, 100% coverage, E-value of  $2 \times 10^{-5}$ ) in human malaria *Plasmodium falciparum*, but not in other malarial species. Interestingly, the second hit for *Plasmodium falciparum* is identified by NCBI as a conserved Plasmodium protein without known function that maps to *P. falciparum* chromosome 12. It is possible that these unexpected sequence alignments result from contamination of parasitic DNA with the abundant satellites from the host used to cultivate these species *in vitro*, although HSAT6 is not the most prevalent human satellite DNA, and other more abundant subtypes were not identified. The possibility of horizontal transfer of host-specific satellite sequences to these parasitic strains needs to be excluded, particularly given the unique role of ncRNAs in the regulation of gene expression in Plasmodium species (*S12*)

## SUPPLEMENTARY FIGURES

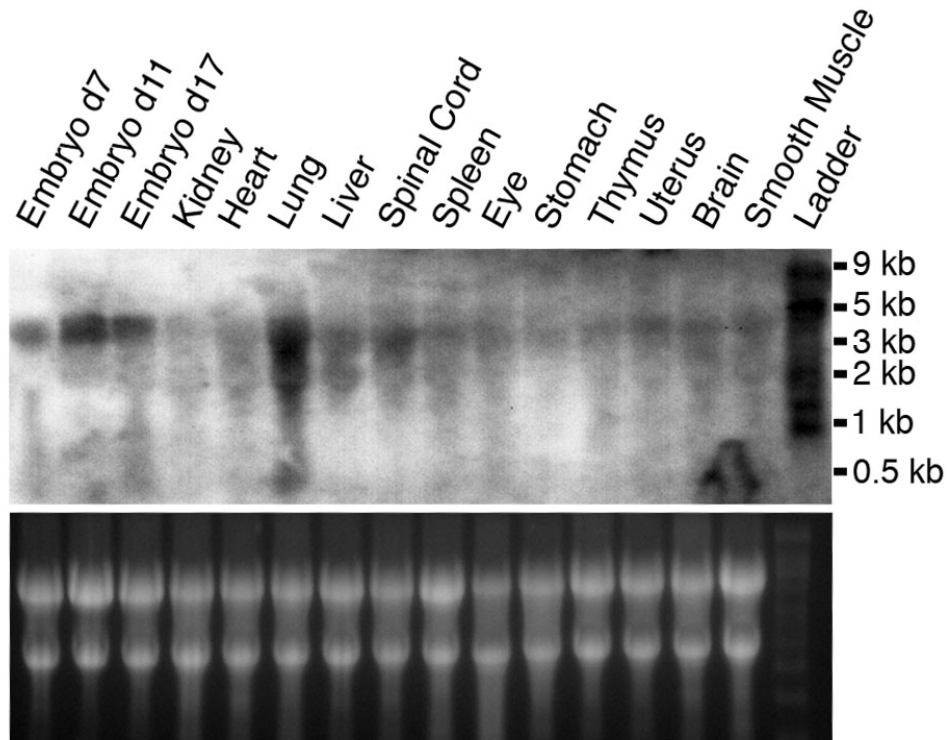

**Figure S1: Northern blot analysis from normal mouse tissues**

Total RNA isolated from multiple adult and fetal mouse tissues analyzed by northern blot.

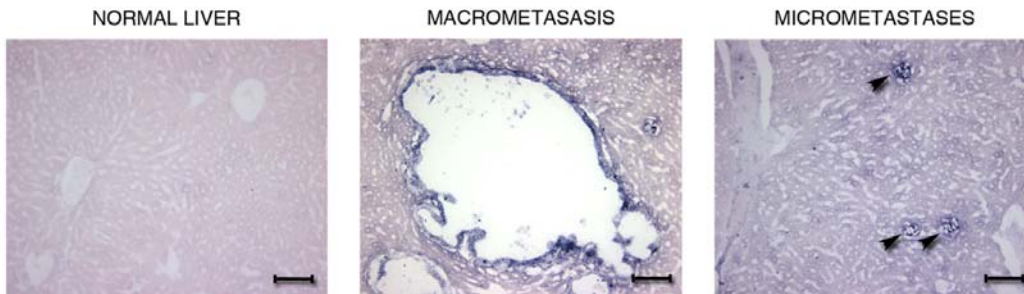

**Figure S2: RNA-ISH of metastatic mouse PDAC**

PDAC metastatic lesions in liver, which itself does not express satellites (left). Large, glandular metastatic tumor deposits are readily identified by standard histological evaluation and stain for satellite (middle). Satellite expressing micrometastases in liver (right; arrowheads). 200x magnification (scale bar = 100  $\mu$ m).

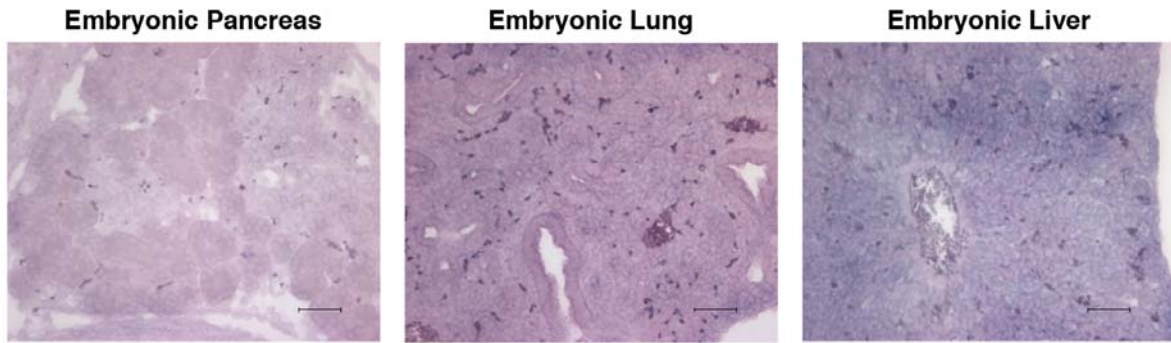

**Figure S3: RNA-ISH of embryonic organs**

Review of whole embryo day 15 demonstrated strongest signal in embryonic liver and lung. Images of embryonic pancreas, liver, and lung shown at 400x magnification (scale bar = 50  $\mu$ m).

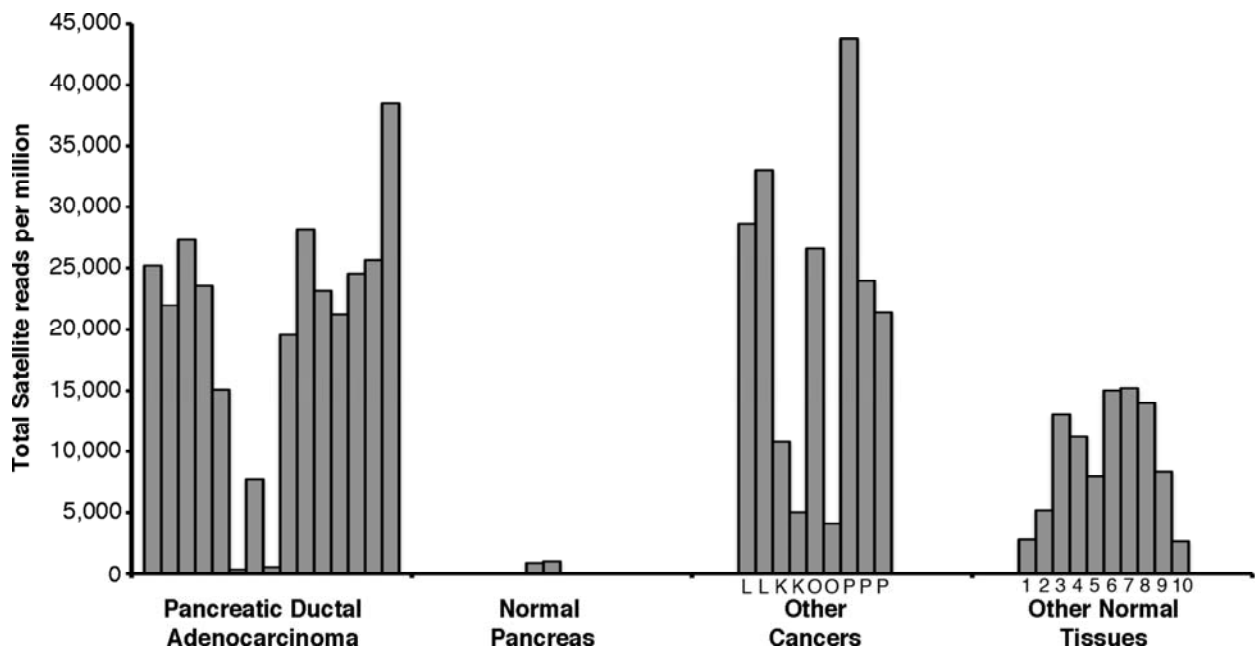

**Figure S4: Total satellite expression in human tissue**

Human pancreatic ductal adenocarcinoma, normal pancreas, other cancers (L – lung, K – kidney, O – ovary, P – prostate), and other normal human tissues (1 - fetal brain, 2 – adult brain, 3 - colon, 4 - fetal liver, 5 – adult liver, 6 - lung, 7 - kidney, 8 - placenta, 9 - prostate, and 10 - uterus) quantitated by DGE. Satellite expression is shown as transcripts per million aligned to human genome.



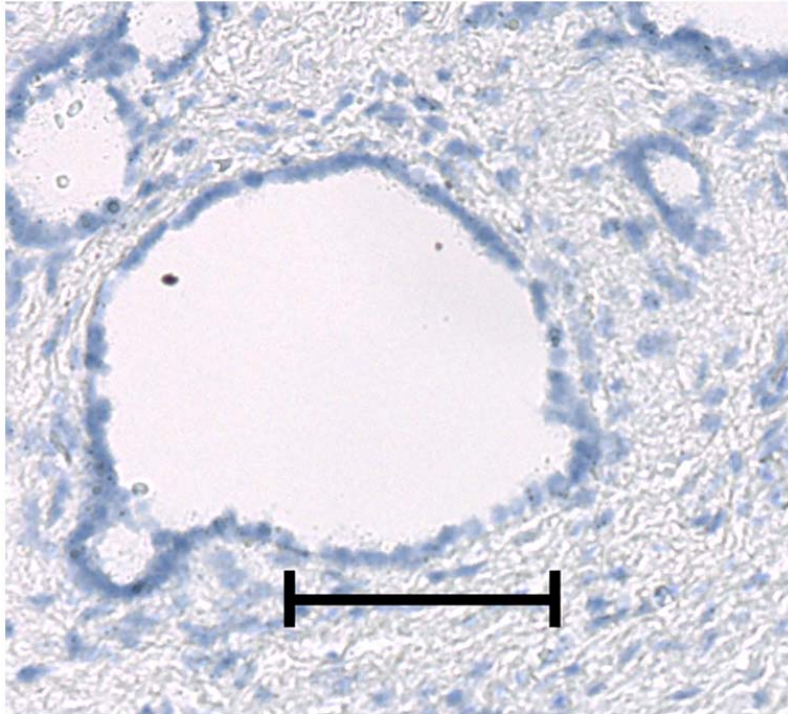

**Figure S5: HSATII RNA-ISH in chronic pancreatitis**

A total of 8 FFPE blocks of chronic pancreatitis were subjected to RNA-ISH for HSATII with nearly absent signal. This absence of signal is different than the normal adjacent tissues we observed in PDAC blocks and may reflect true differences in biology or differences in nucleic acid integrity in chronic pancreatitis.

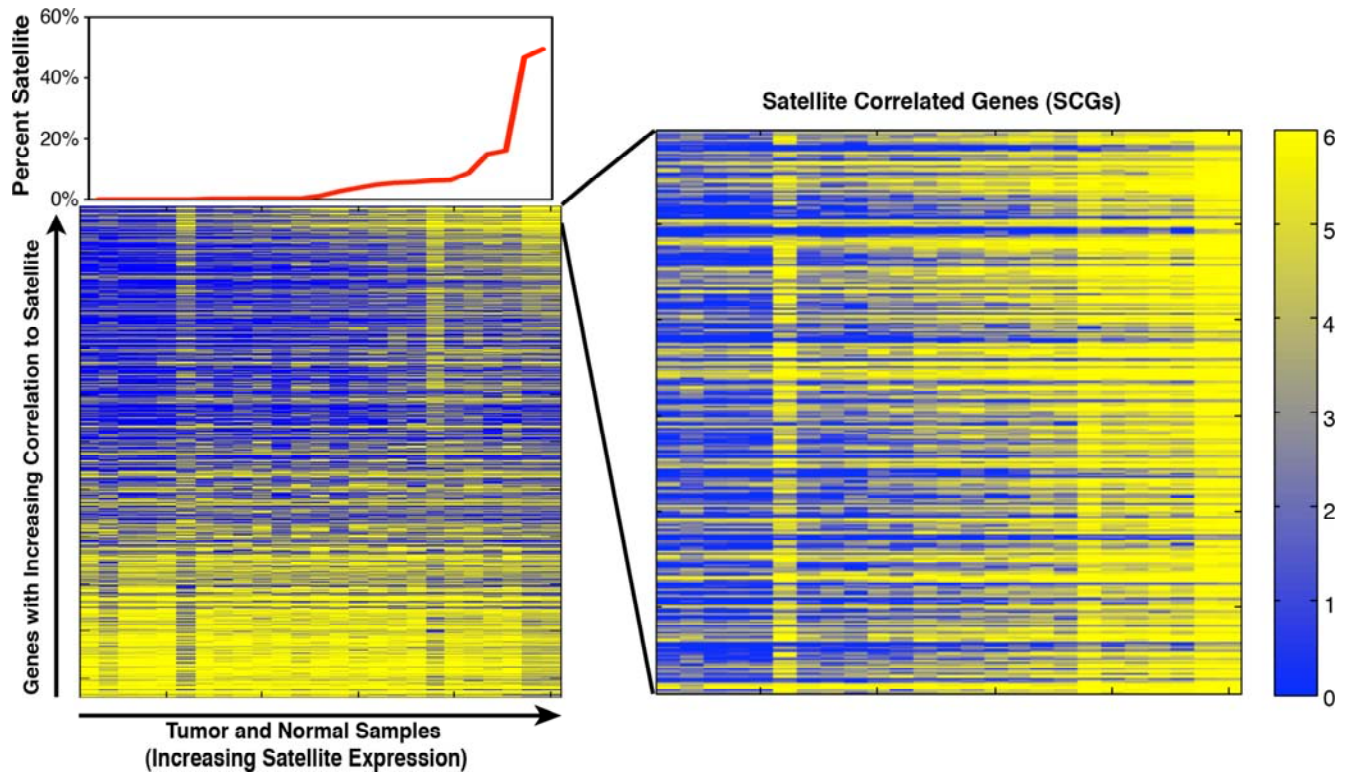

**Figure S6: Linear correlation of transcriptome to major mouse satellite**

Multiple linear correlation analysis of mouse major satellite to other cellular transcripts in all mouse tumors and normal tissues, depicted as heat map (X-axis, samples ordered by increasing expression of major satellite; Y-axis, genes ordered by linear correlation to major satellite expression), with yellow (high) and blue (low) shown as log<sub>2</sub> (reads per million). Expanded view of top satellite correlated genes (SCGs) with highest linearity ( $R > 0.85$ ) with satellite levels.

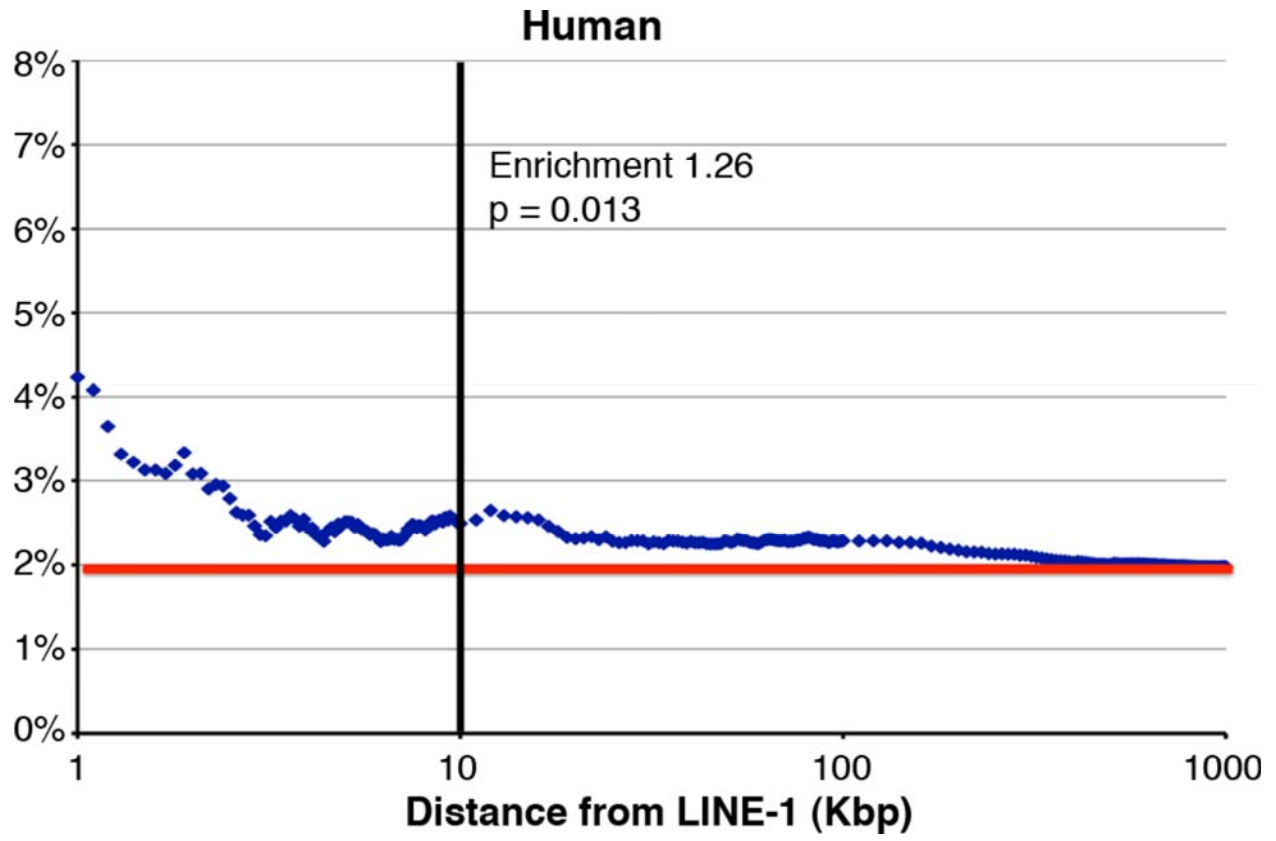

**Figure S7: Relationship of human SCGs to distance from LINE-1**

Fraction of SCGs (blue) versus predicted (red) transcriptional start sites within a given distance of a LINE-1 insertion. Enrichment calculations were done at a distance of 10 kbp (black line)

## SUPPLEMENTARY TABLES

**Table S1: Mouse tissue digital gene expression**

Mouse samples subjected to sequencing with total genomic reads and percentage of reads aligning to transcriptome and major satellite among multiple mouse tumors, cell lines, and normal tissues.

| Mouse ID    | Tissue Type          | Genotype                                                      | Total Genomic Reads | % Transcriptome Reads | % Major Satellite Reads |
|-------------|----------------------|---------------------------------------------------------------|---------------------|-----------------------|-------------------------|
| AH284 Rep 1 | Pancreatic Cancer    | <i>Kras</i> <sup>G12D</sup> , <i>Tp53</i> <sup>lox/+</sup>    | 18,063,363          | 9.56%                 | 46.84%                  |
| AH284 Rep 2 | Pancreatic Cancer    | <i>Kras</i> <sup>G12D</sup> , <i>Tp53</i> <sup>lox/+</sup>    | 16,948,693          | 10.15%                | 49.54%                  |
| AH284 – 2*  | Pancreatic Cancer    | <i>Kras</i> <sup>G12D</sup> , <i>Tp53</i> <sup>lox/+</sup>    | 1,613,592           | 48.67%                | 4.78%                   |
| AH287       | Pancreatic Cancer    | <i>Kras</i> <sup>G12D</sup> , <i>Tp53</i> <sup>lox/+</sup>    | 2,227,850           | 54.70%                | 0.07%                   |
| AH288       | Pancreatic Cancer    | <i>Kras</i> <sup>G12D</sup> , <i>Tp53</i> <sup>lox/+</sup>    | 6,780,821           | 26.57%                | 14.79%                  |
| AH291       | Pancreatic Cancer    | <i>Kras</i> <sup>G12D</sup> , <i>Tp53</i> <sup>lox/+</sup>    | 1,388,906           | 43.12%                | 1.22%                   |
| AH294       | Pancreatic Cancer    | <i>Kras</i> <sup>G12D</sup> , <i>Tp53</i> <sup>lox/+</sup>    | 969,896             | 37.20%                | 3.73%                   |
| AH323       | Pancreatic Cancer    | <i>Kras</i> <sup>G12D</sup> , <i>SMAD4</i> <sup>lox/lox</sup> | 1,887,663           | 72.73%                | 0.29%                   |
| AH346       | Pancreatic Cancer    | <i>Kras</i> <sup>G12D</sup> , <i>SMAD4</i> <sup>lox/lox</sup> | 1,291,648           | 32.92%                | 6.07%                   |
| AH347       | Pancreatic Cancer    | <i>Kras</i> <sup>G12D</sup> , <i>SMAD4</i> <sup>lox/lox</sup> | 1,634,314           | 38.94%                | 8.59%                   |
| AH348       | Pancreatic Cancer    | <i>Kras</i> <sup>G12D</sup> , <i>SMAD4</i> <sup>lox/lox</sup> | 2,030,197           | 45.84%                | 5.61%                   |
| Colon 1     | Colon Cancer - 1     | <i>Kras</i> <sup>G12D</sup> , <i>APC</i> <sup>lox/lox</sup>   | 2,954,930           | 77.49%                | 0.07%                   |
| Colon 1     | Colon Cancer - 2     | <i>Kras</i> <sup>G12D</sup> , <i>APC</i> <sup>lox/lox</sup>   | 985,510             | 53.13%                | 6.27%                   |
| Colon 1     | Colon Cancer - 3     | <i>Kras</i> <sup>G12D</sup> , <i>APC</i> <sup>lox/lox</sup>   | 1,017,319           | 30.71%                | 16.02%                  |
| KN2128      | Lung Cancer          | <i>Kras</i> <sup>G12D</sup> , <i>Tp53</i> <sup>lox/lox</sup>  | 2,233,183           | 60.78%                | 2.66%                   |
| KN2199      | Lung Cancer          | <i>Kras</i> <sup>G12D</sup> , <i>Tp53</i> <sup>lox/lox</sup>  | 1,653,948           | 43.21%                | 5.37%                   |
| AH323       | PDAC Cell Line       | <i>Kras</i> <sup>G12D</sup> , <i>SMAD4</i> <sup>lox/lox</sup> | 1,958,108           | 83.13%                | 0.02%                   |
| AH324       | PDAC Cell Line       | <i>Kras</i> <sup>G12D</sup> , <i>Tp53</i> <sup>lox/+</sup>    | 3,301,108           | 86.32%                | 0.04%                   |
| NB490       | PDAC Cell Line       | <i>Kras</i> <sup>G12D</sup> , <i>Tp53</i> <sup>lox/lox</sup>  | 15,378,802          | 76.85%                | 0.03%                   |
| AH284 Rep 1 | Matched Normal Liver | <i>Kras</i> <sup>G12D</sup> , <i>Tp53</i> <sup>lox/+</sup>    | 2,270,669           | 75.68%                | 0.40%                   |
| AH284 Rep 2 | Matched Normal Liver | <i>Kras</i> <sup>G12D</sup> , <i>Tp53</i> <sup>lox/+</sup>    | 1,627,749           | 56.59%                | 0.34%                   |
| AH284 – 2*  | Matched Normal Liver | <i>Kras</i> <sup>G12D</sup> , <i>Tp53</i> <sup>lox/+</sup>    | 644,316             | 41.10%                | 0.31%                   |
| Colon 1     | Matched Normal Liver | <i>Kras</i> <sup>G12D</sup> , <i>APC</i> <sup>lox/lox</sup>   | 1,536,346           | 86.53%                | 0.02%                   |
| Normal 1    | Normal Pancreas      | WT                                                            | 247,582             | 14.49%                | 0.41%                   |
| Normal 2    | Normal Pancreas      | WT                                                            | 244,719             | 11.15%                | 0.41%                   |

\* AH284-2 was RNA extraction from a different part of the pancreatic tumor and liver

**Table S2: Genomic DNA copy number variation analysis of AH284 PDAC and matched liver.**

To determine whether genomic amplification of satellite repeats also contributes toward the exceptional abundance of these transcripts in mouse pancreatic tumors, we analyzed the index AH284 tumor using next generation DNA digital copy number variation (CNV) analysis: satellite DNA comprise 18.8% of all genome-aligned reads in this tumor, compared with 2.3% of genomic sequences in matched normal liver. The major satellite repeat has previously been estimated at approximately 3% of the normal mouse genome (13). Thus, in this tumor with >100-fold increased expression of satellite repeats, approximately 8-fold gene amplification of the repeats may contribute to their abnormal expression. Major satellite reads and percent of total genomic reads shown.

|             | Major Satellite Reads | Total Genomic Reads |
|-------------|-----------------------|---------------------|
| AH284 Liver | 183,327<br>(2.3%)     | 7,995,538           |
| AH284 PDAC  | 2,283,436<br>(18.8%)  | 12,124,201          |

**Table S3: Human tissue digital gene expression**

Human samples subjected to sequencing with total genomic reads and proportion of reads aligning to all human satellites, alpha (ALR) satellite, and HSATII satellite in transcripts per million (tpm).

| <b>SAMPLE ID</b>   | <b>Genome</b> | <b>Total Satellite (tpm)</b> | <b>ALR (tpm)</b> | <b>HSATII (tpm)</b> |
|--------------------|---------------|------------------------------|------------------|---------------------|
| PDAC 1             | 4,472,810     | 25,209                       | 14,688           | 3,589               |
| PDAC 2             | 1,668,281     | 22,001                       | 12,653           | 3,295               |
| PDAC 3             | 5,211,399     | 27,366                       | 15,921           | 5,057               |
| PDAC 4             | 1,649,041     | 23,556                       | 13,428           | 3,167               |
| PDAC 5             | 239,483       | 15,095                       | 8,259            | 509                 |
| PDAC 6             | 1,520,470     | 374                          | 195              | 14                  |
| PDAC 7             | 1,449,321     | 7,738                        | 4,400            | 750                 |
| PDAC 8             | 1,950,197     | 574                          | 316              | 9                   |
| PDAC 9             | 3,853,773     | 19,572                       | 12,563           | 1,731               |
| PDAC 10            | 2,748,850     | 28,225                       | 18,767           | 2,489               |
| PDAC 11            | 2,848,599     | 23,163                       | 14,634           | 2,589               |
| PDAC 12            | 3,723,326     | 21,243                       | 12,940           | 2,122               |
| PDAC 13            | 1,834,743     | 24,549                       | 15,342           | 3,150               |
| PDAC 14            | 2,481,332     | 25,650                       | 18,016           | 2,564               |
| PDAC 15            | 1,752,081     | 38,514                       | 25,899           | 5,210               |
| Normal Pancreas 1  | 1,196,372     | 908                          | 284              | 0                   |
| Normal Pancreas 2  | 975,676       | 1,043                        | 303              | 0                   |
| Lung Cancer 1      | 1,549,237     | 28,658                       | 18,751           | 4,417               |
| Lung Cancer 2      | 13,829,845    | 33,030                       | 26,143           | 2,555               |
| Kidney Cancer 1    | 2,104,859     | 10,814                       | 6,505            | 1,501               |
| Kidney Cancer 2    | 4,753,409     | 5,025                        | 2,739            | 625                 |
| Ovarian Cancer 1   | 12,596,542    | 26,658                       | 14,513           | 3,074               |
| Ovarian Cancer 2   | 7,290,000     | 4,089                        | 2,058            | 403                 |
| Prostate Cancer 1  | 3,376,849     | 43,730                       | 22,244           | 9,793               |
| Prostate Cancer 2  | 12,052,244    | 23,947                       | 14,201           | 3,209               |
| Prostate Cancer 3  | 3,631,148     | 21,411                       | 12,390           | 2,804               |
| Normal Fetal Brain | 384,453       | 2,843                        | 1,516            | 3                   |
| Normal Brain       | 371,161       | 5,184                        | 2,573            | 3                   |
| Normal Colon       | 183,855       | 13,059                       | 7,229            | 5                   |
| Normal Fetal Liver | 147,977       | 11,218                       | 5,879            | 7                   |
| Normal Liver       | 117,976       | 7,968                        | 3,730            | 25                  |
| Normal Lung        | 208,089       | 15,027                       | 7,857            | 5                   |
| Normal Kidney      | 144,173       | 15,218                       | 8,094            | 7                   |
| Normal Placenta    | 207,929       | 13,990                       | 7,815            | 0                   |
| Normal Prostate    | 263,406       | 8,409                        | 2,228            | 19                  |
| Normal Uterus      | 477,480       | 2,702                        | 1,395            | 2                   |

**Table S4: Mouse Satellite Correlated Genes**

Annotated transcripts with high linearity with major satellite repeat ( $R > 0.85$ ) and classification using DAVID NIH Database.

| <b>GENE NAME</b> | <b>Neural</b> | <b>Germ/Stem Cell</b> | <b>Zinc Finger Domain</b> |
|------------------|---------------|-----------------------|---------------------------|
| 1190005F20Rik    | x             |                       | X                         |
| 1200014J11Rik    |               | x                     |                           |
| 2510002D24Rik    |               |                       |                           |
| 2810021B07Rik    | x             | x                     |                           |
| 2810408P10Rik    | x             |                       | X                         |
| 4832428D23Rik    |               |                       |                           |
| 4930486G11Rik    | x             |                       |                           |
| 4930555G01Rik    | x             | x                     |                           |
| 4932411N23Rik    |               | x                     |                           |
| 6330439K17Rik    | x             |                       |                           |
| 9330155M09Rik    | x             |                       |                           |
| 9630025I21Rik    |               |                       | x                         |
| 9930013L23Rik    | x             |                       |                           |
| A130023I24Rik    |               |                       |                           |
| AA388235         | x             | x                     |                           |
| Acer1            |               |                       |                           |
| Acss3            |               |                       |                           |
| Adamts6          |               |                       |                           |
| Adra1a           | x             |                       |                           |
| Aff2             | x             |                       |                           |
| Agbl3            | x             |                       |                           |
| Ap4e1            | x             |                       |                           |
| Aplf             | x             |                       |                           |
| Apol8            |               |                       |                           |
| Aqp7             |               | x                     |                           |
| Armc9            | x             | x                     |                           |
| Cdnf             |               |                       |                           |
| Astn2            | x             |                       |                           |
| Atg16l1          | x             | x                     |                           |
| B020018G12Rik    |               |                       |                           |
| Bbs1             |               | x                     |                           |
| Btbd7            | x             | x                     |                           |
| Cadm3            | x             |                       |                           |
| Cage1            | x             | x                     |                           |

|         |   |   |   |
|---------|---|---|---|
| Camk2a  | x |   |   |
| Ccdc114 |   | x |   |
| Ccdc132 | x | x |   |
| Cckar   | x |   |   |
| Cenpc1  | x |   |   |
| Chst3   | x |   |   |
| Clasp2  | x |   |   |
| Clec4a2 | x |   |   |
| Cplx2   | x |   |   |
| Crnk11  |   | x |   |
| Crx     | x | x |   |
| Csmd3   | x | x |   |
| Cx3cr1  | x |   |   |
| Dclre1b | x | x |   |
| Defb42  | x |   |   |
| Dnajb14 |   | x |   |
| Dnm3    | x |   |   |
| Dok6    |   |   |   |
| Dub1    | x |   |   |
| Eif2ak2 |   |   |   |
| Eif4e3  |   | x |   |
| Ermp1   |   | x |   |
| Fam110b | x |   |   |
| Fgd4    | x |   |   |
| Gabra2  | x |   |   |
| Galnt13 | x |   |   |
| Gcm1    |   | x |   |
| Gga2    | x |   |   |
| Gje1    | x |   |   |
| Gk5     |   | x |   |
| Glpr112 |   | x |   |
| Glrx2   | x | x |   |
| Gm13242 |   |   | x |
| Gm4841  |   |   |   |
| Gm5094  |   |   |   |
| Gm5546  | x |   |   |
| Gm7120  | x |   |   |
| Shisa6  |   |   |   |
| Gpr98   | x |   |   |
| Gria3   | x |   |   |
| Grk1    | x |   |   |



|                |   |   |   |
|----------------|---|---|---|
| Grk4           | x | x |   |
| Hecw1          | x |   |   |
| Hspbap1        |   |   |   |
| Ikbkb          | x |   |   |
| Il17rd         |   | x | x |
| Il18rap        |   |   |   |
| Il21           | x |   |   |
| Il2ra          |   |   |   |
| Cxcr2          |   | x |   |
| Irf9           |   |   |   |
| Itga4          | x | x |   |
| Kcnj10         | x | x |   |
| Kcnmb1         | x |   |   |
| Khdrbs2        | x | x |   |
| Kl             | x |   |   |
| L1cam          | x |   |   |
| L1td1 (Line-1) |   | x |   |
| Lag3           | x |   |   |
| Lefty2         |   | x |   |
| Lipi           | x |   |   |
| Lmf1           |   |   |   |
| Lym1           |   | x |   |
| Plin3          |   |   |   |
| Malt1          | x |   |   |
| Me3            | x | x |   |
| Med16          | x |   |   |
| Mrgprb1        |   |   |   |
| Mrpl13         |   | x |   |
| Ms4a7          |   |   |   |
| Msx2           |   |   |   |
| Mtif2          |   | x |   |
| Mto1           |   |   |   |
| Myh8           | x |   |   |
| Mzf1           | x |   | x |
| Nhedc1         |   | x |   |
| Nkain3         | x |   |   |
| Nol3           | x |   |   |
| Npy1r          | x |   |   |
| Nsun7          |   | x |   |
| Obox3          |   | x |   |
| Olf628         |   |   |   |

|           |   |   |   |
|-----------|---|---|---|
| Onecut3   | x |   |   |
| Otx1      | x |   |   |
| P4ha2     |   |   |   |
| Pard3b    | x |   |   |
| Pcdh10    | x |   |   |
| Pde4a     | x |   |   |
| Cdk14     | x | x |   |
| Phka1     | x |   |   |
| Piga      | x |   |   |
| Pik3r4    | x |   |   |
| Pkn1      | x |   |   |
| Plcx3     | x |   |   |
| Polq      | x | x |   |
| Prdm8     | x |   | x |
| Prkcb     | x |   |   |
| Prkg1     | x |   |   |
| Prmt10    |   |   |   |
| Prosapip1 |   |   |   |
| Psg28     | x |   |   |
| Psmb11    |   |   |   |
| Rab8b     | x |   |   |
| Rag2      |   |   |   |
| Rbm34     | x |   |   |
| Rfesd     | x |   |   |
| Rgs9      | x |   |   |
| Rgs9bp    | x |   |   |
| Rhbdl2    |   |   |   |
| Rnf150    | x |   |   |
| Scd4      |   |   |   |
| Serpina3a |   | x |   |
| Sfrp4     | x |   |   |
| Six2      |   |   |   |
| Skint4    |   |   |   |
| Slc17a8   | x |   |   |
| Slc22a9   |   |   |   |
| Slc25a40  | x |   |   |
| Slc26a8   | x |   |   |
| Slc2a4    | x |   |   |
| Slc4a1ap  | x |   |   |
| Slc6a2    | x |   |   |
| Slc6a5    | x |   |   |

|         |   |   |   |
|---------|---|---|---|
| Slco1c1 | x |   |   |
| Slfn8   |   |   |   |
| Slfn9   |   |   |   |
| Snai2   |   |   | x |
| Spaca1  | x | x |   |
| Spc25   | x |   |   |
| Sfrs13b |   |   |   |
| St8sia1 | x |   |   |
| Sult3a1 | x |   |   |
| Supt7l  | x | x |   |
| Syt15   |   |   |   |
| Tacr1   | x |   |   |
| Tbx5    | x |   |   |
| Tctn2   | x |   |   |
| Prss43  |   |   |   |
| Thada   | x | x |   |
| Tigd3   | x | x |   |
| Tigd4   |   |   |   |
| Tmem91  | x |   |   |
| Topbp1  | x |   |   |
| Tox4    |   | x |   |
| Traf5   |   |   |   |
| Trhr    |   |   |   |
| Trpm3   | x |   |   |
| Tspan18 |   |   |   |
| Ttc21b  | x |   |   |
| Uevld   | x |   |   |
| Ulk3    | x |   |   |
| Vmn1r58 |   |   |   |
| Vmn2r55 |   |   |   |
| Xpo7    | x | x |   |
| Zfp353  |   |   | x |
| Zfp459  |   |   | x |
| Zfp473  |   | x | x |
| Zfp488  | x |   | x |
| Zfp560  | x |   | x |
| Zfp874  | x |   | x |
| Zfyve28 |   |   |   |
| Zmat1   |   | X | x |
| Zmat3   | x |   | x |
| Zmym5   | x |   |   |

|            |  |  |  |
|------------|--|--|--|
| uc007ais.1 |  |  |  |
| uc007bjl.1 |  |  |  |
| uc007bvm.1 |  |  |  |
| uc007das.1 |  |  |  |
| uc007epk.1 |  |  |  |
| uc007epl.1 |  |  |  |
| uc007etc.1 |  |  |  |
| uc007fow.1 |  |  |  |
| uc007fye.1 |  |  |  |
| uc007gji.1 |  |  |  |
| uc007gyq.1 |  |  |  |
| uc007ilo.1 |  |  |  |
| uc007kpk.1 |  |  |  |
| uc007kpl.1 |  |  |  |
| uc007ksq.1 |  |  |  |
| uc007ncm.1 |  |  |  |
| uc007oee.1 |  |  |  |
| uc007okg.1 |  |  |  |
| uc007pip.1 |  |  |  |
| uc007qaj.1 |  |  |  |
| uc007qgo.1 |  |  |  |
| uc007qwh.1 |  |  |  |
| uc007rhg.1 |  |  |  |
| uc007ric.1 |  |  |  |
| uc007rjz.1 |  |  |  |
| uc007tqu.1 |  |  |  |
| uc007vdl.1 |  |  |  |
| uc007vxx.1 |  |  |  |
| uc007wsb.1 |  |  |  |
| uc007ydk.1 |  |  |  |
| uc008aec.1 |  |  |  |
| uc008aki.1 |  |  |  |
| uc008dlt.1 |  |  |  |
| uc008dwg.1 |  |  |  |
| uc008dwr.1 |  |  |  |
| uc008dyu.1 |  |  |  |
| uc008ekc.1 |  |  |  |
| uc008elg.1 |  |  |  |
| uc008ewf.1 |  |  |  |
| uc008fxu.1 |  |  |  |
| uc008ghy.1 |  |  |  |

|            |  |  |  |
|------------|--|--|--|
| uc008hdz.1 |  |  |  |
| uc008hes.1 |  |  |  |
| uc008hln.1 |  |  |  |
| uc008hym.1 |  |  |  |
| uc008hyp.1 |  |  |  |
| uc008ibk.1 |  |  |  |
| uc008ivz.1 |  |  |  |
| uc008jyy.1 |  |  |  |
| uc008kvl.1 |  |  |  |
| uc008laa.1 |  |  |  |
| uc008lfo.1 |  |  |  |
| uc008lqq.1 |  |  |  |
| uc008lsd.1 |  |  |  |
| uc008mru.1 |  |  |  |
| uc008msi.1 |  |  |  |
| uc008msj.1 |  |  |  |
| uc008ofl.1 |  |  |  |
| uc008ogy.1 |  |  |  |
| uc008ohe.1 |  |  |  |
| uc008ovz.1 |  |  |  |
| uc008oxq.1 |  |  |  |
| uc008oxr.1 |  |  |  |
| uc008pbs.1 |  |  |  |
| uc008pdh.1 |  |  |  |
| uc008pwt.1 |  |  |  |
| uc008qgg.1 |  |  |  |
| uc008qnj.1 |  |  |  |
| uc008rib.1 |  |  |  |
| uc008rks.1 |  |  |  |
| uc008tmh.1 |  |  |  |
| uc008vsq.1 |  |  |  |
| uc008vss.1 |  |  |  |
| uc008vsw.1 |  |  |  |
| uc008wgl.1 |  |  |  |
| uc008wpr.1 |  |  |  |
| uc008yil.1 |  |  |  |
| uc008ype.1 |  |  |  |
| uc008ypk.1 |  |  |  |
| uc008zfa.1 |  |  |  |
| uc009auf.1 |  |  |  |
| uc009biv.1 |  |  |  |

|            |  |  |  |
|------------|--|--|--|
| uc009bte.1 |  |  |  |
| uc009eds.1 |  |  |  |
| uc009fxk.1 |  |  |  |
| uc009gaq.1 |  |  |  |
| uc009ify.1 |  |  |  |
| uc009lfw.1 |  |  |  |
| uc009lop.1 |  |  |  |
| uc009lxi.1 |  |  |  |
| uc009mey.1 |  |  |  |
| uc009mgu.1 |  |  |  |
| uc009pbg.1 |  |  |  |
| uc009qbe.1 |  |  |  |
| uc009tki.1 |  |  |  |
| uc009tzq.1 |  |  |  |
| uc009tzi.1 |  |  |  |
| uc009vam.1 |  |  |  |
| uc009vfd.1 |  |  |  |

**Table S5: Human Satellite Correlated Genes**

Annotated human transcripts with high linearity with ALR satellite ( $R > 0.85$ ) and classification using DAVID NIH Database.

| GENE NAME | Neural | Germ/Stem Cell | Zinc Finger Domain |
|-----------|--------|----------------|--------------------|
| A2ML1     |        |                |                    |
| ABCA9     | x      | x              |                    |
| ACADSB    |        |                |                    |
| ACBD7     | x      |                |                    |
| ADAMTSL3  | x      |                |                    |
| ALG11     |        |                |                    |
| ANGEL2    | x      |                |                    |
| ANKRD20A1 |        | x              |                    |
| AP1S3     | x      |                |                    |
| APOL4     |        |                |                    |
| APOL6     |        |                |                    |
| ATP10B    | x      |                |                    |
| BNC1      |        |                | x                  |
| C11ORF72  |        |                |                    |
| C11ORF74  |        |                |                    |
| C12ORF5   |        |                |                    |
| C13ORF29  | x      |                |                    |
| C15ORF2   |        |                |                    |
| C15ORF28  |        | x              |                    |
| C17ORF77  |        |                |                    |
| C1ORF130  | x      |                |                    |
| C1ORF69   |        |                |                    |
| C1ORF84   | x      | x              |                    |
| C21ORF82  | x      |                |                    |
| C3ORF20   | x      | x              |                    |
| C6ORF170  | x      | x              |                    |
| C7ORF44   |        | x              |                    |
| C7ORF46   | x      |                |                    |
| C8ORF12   |        |                |                    |
| C9ORF68   | x      |                |                    |
| CAGE1     |        | x              |                    |
| CCBP2     |        |                |                    |
| CCDC122   |        |                |                    |
| CCDC52    | x      |                |                    |
| CD3EAP    | x      | x              |                    |
| CDON      | x      |                |                    |
| CENPM     | x      |                |                    |
| CES3      |        | x              |                    |
| CES7      | x      |                |                    |
| CHRM5     | x      | x              |                    |
| CLCC1     | x      |                |                    |
| COX18     | x      |                |                    |

|               |   |   |   |
|---------------|---|---|---|
| CPM           |   |   |   |
| CPSF2         | x | x |   |
| CYP46A1       | x |   |   |
| DBF4B         |   |   | x |
| DCHS2         | x |   |   |
| DDO           | x |   |   |
| DHRS4L2       |   |   |   |
| DKFZP434L187  |   | x |   |
| DKFZP779L1853 |   |   |   |
| DNAH5         | x | x |   |
| DNAH8         |   | x |   |
| DSG3          |   |   |   |
| DUSP19        |   | x |   |
| DZIP3         | x | x | x |
| EEF2K         |   |   |   |
| F2RL3         |   |   |   |
| FAM111B       |   | x |   |
| FAM122C       |   | x |   |
| FAM22G        |   |   |   |
| FAM75A2       |   |   |   |
| FAM83D        |   |   |   |
| FAT3          | x |   |   |
| FBXO15        | x | x |   |
| FBXW10        |   | x |   |
| FCF1          | x |   |   |
| FER           |   |   |   |
| FGF5          | x |   |   |
| FLJ11292      |   |   |   |
| FLJ41649      |   |   |   |
| FLJ43763      |   | x |   |
| FUT1          | x |   |   |
| GALNT13       | x | x |   |
| GBP4          | x | x |   |
| GK5           | x |   |   |
| GLIPR1L2      | x | x |   |
| GPR110        |   |   |   |
| GPR157        |   |   |   |
| GTPBP10       | x |   |   |
| GTSE1         | x |   |   |
| GUSBP1        |   |   |   |
| HERC4         | x |   |   |
| HESRG         |   | x |   |
| HIF3A         | x | x |   |
| HMGA2         |   |   |   |
| HRH4          |   |   |   |
| HUNK          |   |   |   |
| HYDIN         | x | x |   |



|           |   |   |   |
|-----------|---|---|---|
| IL12RB1   |   |   |   |
| IPO9      | x |   |   |
| KCTD18    | x | x |   |
| KIAA1245  |   |   |   |
| KIAA1257  | x | x |   |
| KIAA1328  | x |   |   |
| KIR3DX1   |   |   |   |
| LEPRE1    | x | x |   |
| LOC147804 |   |   |   |
| LOC349196 |   |   |   |
| LOC440313 |   |   |   |
| LOC441242 |   | x |   |
| LOC441426 |   |   |   |
| LOC642980 |   |   |   |
| LOC643406 | x | x |   |
| LOC649305 | x |   |   |
| LOC91948  |   |   |   |
| LRRC2     | x |   |   |
| LTV1      |   |   |   |
| LYRM2     |   | x |   |
| LYRM7     | x |   |   |
| MCFD2     | x |   |   |
| MED18     |   |   |   |
| MORC4     |   | x | x |
| MSH5      |   | x |   |
| MTBP      |   | x |   |
| MX2       | x |   |   |
| MYH1      |   |   |   |
| MYO3B     |   |   |   |
| MYOM3     | x | x |   |
| NBPF1     |   |   |   |
| NEB       | x |   |   |
| NHEDC1    | x | x |   |
| NIPSNAP3B |   |   |   |
| NME7      | x |   |   |
| NMNAT1    |   |   |   |
| NUP43     |   | x |   |
| ODF2L     | x |   |   |
| OR11H1    | x |   |   |
| OR11H12   | x |   |   |
| OR4F16    | x |   |   |
| OR4K15    | x |   |   |
| OR7D2     | x |   |   |
| OR7E156P  | x |   |   |
| ORC6L     |   | x |   |
| PCBD2     |   |   |   |
| PDDC1     | x |   |   |

|          |   |   |   |
|----------|---|---|---|
| PGPEP1   | x |   |   |
| PHACTR4  | x | x |   |
| PHTF1    |   |   |   |
| PLA2G2D  |   |   |   |
| PLEKHA5  | x |   |   |
| PRKRIR   | x |   | x |
| PRND     | x | x |   |
| PXMP4    | x |   |   |
| QTRTD1   |   | x |   |
| RASGRP3  | x |   | x |
| REXOIL1  |   |   |   |
| RGR      | x |   |   |
| RNF125   |   | x | x |
| SIGLEC10 |   |   |   |
| SIGLEC8  |   |   |   |
| SIRPB1   | x |   |   |
| SLC13A2  |   |   |   |
| SLC14A2  |   | x |   |
| SLC16A12 |   |   |   |
| SLC19A3  | x |   |   |
| SLC1A6   | x | x |   |
| SLC27A1  |   |   |   |
| SLC31A1  | x |   |   |
| SMU1     |   | x |   |
| SP100    |   |   |   |
| STRC     |   |   |   |
| STX17    | x | x |   |
| TAOK1    | x |   |   |
| TCL6     |   |   |   |
| TEX9     | x |   |   |
| TGFB2    |   |   |   |
| TIGD1    | x |   |   |
| TNFRSF19 | x |   |   |
| TRIM43   |   |   | x |
| TRPM3    | x |   |   |
| TTN      | x | x |   |
| ULBP1    | x | x |   |
| USPL1    | x | x |   |
| UTP14C   |   |   |   |
| WDR17    | x |   |   |
| WDR31    |   | x |   |
| XKR9     |   |   |   |
| XRCC2    | x | x |   |
| ZFYVE20  | x |   | x |
| ZMYM1    |   | x | x |
| ZMYND17  | x |   | x |
| ZNF100   |   | x | x |

|                |   |   |   |
|----------------|---|---|---|
| ZNF192         |   | x | x |
| ZNF208         |   |   | x |
| ZNF273         |   |   | x |
| ZNF320         | x |   | x |
| ZNF331         |   | x | x |
| ZNF37A         |   |   | x |
| ZNF383         |   | x | x |
| ZNF431         | x | x | x |
| ZNF445         | x |   | x |
| ZNF471         | x |   | x |
| ZNF480         | x | x | x |
| ZNF490         | x | x | x |
| ZNF492         | x |   | x |
| ZNF493         | x |   | x |
| ZNF528         | x | x | x |
| ZNF562         |   |   | x |
| ZNF621         |   |   | x |
| ZNF623         | x |   | x |
| ZNF667         |   |   | x |
| ZNF670         |   |   | x |
| ZNF7           |   |   | x |
| ZNF720         |   |   | x |
| ZNF804B        | x |   | x |
| BC029464       |   |   |   |
| BC082237       |   |   |   |
| BC050580       |   |   |   |
| BC039319       |   |   |   |
| AK096834       |   |   |   |
| BC042893       |   |   |   |
| BC043508       |   |   |   |
| HBET1          |   |   |   |
| NR_003246      |   |   |   |
| LOC643079      |   |   |   |
| BC040190       |   |   |   |
| AK095450       |   |   |   |
| BC036442       |   |   |   |
| DKFZP761G18121 |   |   |   |
| AK092337       |   |   |   |
| KIAA0379       |   |   |   |
| FLJ44076       |   |   |   |
| AX748237       |   |   |   |
| AX747345       |   |   |   |
| AX747165       |   |   |   |
| CR627148       |   |   |   |
| UNQ2963        |   |   |   |
| DKFZP667M2411  |   |   |   |
| AK125319       |   |   |   |

|                         |  |  |  |
|-------------------------|--|--|--|
| AK125996                |  |  |  |
| AK026805                |  |  |  |
| AK129982                |  |  |  |
| CR592614                |  |  |  |
| AK095077                |  |  |  |
| BC035989                |  |  |  |
| CR623134                |  |  |  |
| AK026100                |  |  |  |
| RP1-140A9.6             |  |  |  |
| AX747405                |  |  |  |
| NR_002828               |  |  |  |
| NR_003130               |  |  |  |
| BIRC4BP                 |  |  |  |
| AK054836                |  |  |  |
| AX747417                |  |  |  |
| AY314745                |  |  |  |
| NR_001318               |  |  |  |
| AX747586                |  |  |  |
| AK125128                |  |  |  |
| AK055694                |  |  |  |
| BC035084                |  |  |  |
| WUGSC:H_DJ0855D2<br>1.2 |  |  |  |
| CR596262                |  |  |  |
| AX746734                |  |  |  |
| AK024378                |  |  |  |
| BC037952                |  |  |  |
| BC041998                |  |  |  |
| BC008050                |  |  |  |
| NR_003133               |  |  |  |
| AX748369                |  |  |  |
| BC043541                |  |  |  |
| AK131347                |  |  |  |
| FLJ00140                |  |  |  |
| CR620525                |  |  |  |
| AX748243                |  |  |  |
| AX747639                |  |  |  |
| AX746484                |  |  |  |
| CR605783                |  |  |  |
| AK097143                |  |  |  |
| BC052952                |  |  |  |
| AK124179                |  |  |  |
| FLJ16008                |  |  |  |
| BC073807                |  |  |  |
| BC015784                |  |  |  |
| CR592225                |  |  |  |
| BC031280                |  |  |  |
| DKFZP686F19123          |  |  |  |

|               |  |  |  |
|---------------|--|--|--|
| AX747440      |  |  |  |
| AK096469      |  |  |  |
| AK124893      |  |  |  |
| AX747721      |  |  |  |
| AK123584      |  |  |  |
| NR_003263     |  |  |  |
| DKFZP762C213  |  |  |  |
| BC094791      |  |  |  |
| CR627394      |  |  |  |
| AK124673      |  |  |  |
| NR_002910     |  |  |  |
| FRABIN        |  |  |  |
| BC069727      |  |  |  |
| BC037884      |  |  |  |
| BX648696      |  |  |  |
| CR627383      |  |  |  |
| BC034569      |  |  |  |
| AX747308      |  |  |  |
| AK123585      |  |  |  |
| BC011779      |  |  |  |
| DKFZP686H1615 |  |  |  |
| BC070093      |  |  |  |
| BX537874      |  |  |  |
| AX748226      |  |  |  |
| CR598144      |  |  |  |
| BC040189      |  |  |  |
| AL832479      |  |  |  |
| NR_002939     |  |  |  |
| AL833449      |  |  |  |
| BC047600      |  |  |  |
| KIAA1031      |  |  |  |
| AK095766      |  |  |  |
| AL832786      |  |  |  |
| BC035181      |  |  |  |
| NR_002220     |  |  |  |
| DQ596646      |  |  |  |
| NM_001001704  |  |  |  |
| AL832797      |  |  |  |
| AK129672      |  |  |  |
| AK123838      |  |  |  |
| AX746771      |  |  |  |
| C20ORF38      |  |  |  |
| AX746989      |  |  |  |
| LOC285382     |  |  |  |
| MGC102966     |  |  |  |
| AK124194      |  |  |  |
| FLJ45337      |  |  |  |

|              |  |  |  |
|--------------|--|--|--|
| AK126334     |  |  |  |
| AK057596     |  |  |  |
| NR_003128    |  |  |  |
| AK096077     |  |  |  |
| DERP7        |  |  |  |
| AK098126     |  |  |  |
| BC033330     |  |  |  |
| BC029555     |  |  |  |
| LOC129881    |  |  |  |
| AK097527     |  |  |  |
| BX648961     |  |  |  |
| AK096499     |  |  |  |
| AK097777     |  |  |  |
| AK091028     |  |  |  |
| FLJ37953     |  |  |  |
| PTPN1L       |  |  |  |
| AK096196     |  |  |  |
| AK056351     |  |  |  |
| AX746750     |  |  |  |
| LOC440053    |  |  |  |
| BC068605     |  |  |  |
| UNQ9369      |  |  |  |
| PFDN6L       |  |  |  |
| AK125042     |  |  |  |
| AK125489     |  |  |  |
| BC013681     |  |  |  |
| AK056866     |  |  |  |
| AX747590     |  |  |  |
| AX746620     |  |  |  |
| FLJ00310     |  |  |  |
| NM_001042703 |  |  |  |
| AK094618     |  |  |  |
| AX748002     |  |  |  |
| BC041646     |  |  |  |
| AJ617629     |  |  |  |
| AL833139     |  |  |  |
| AK097428     |  |  |  |
| AK056105     |  |  |  |
| MGC13098     |  |  |  |
| AK127557     |  |  |  |
| KIAA1456     |  |  |  |
| BC069809     |  |  |  |
| LOC441108    |  |  |  |
| NM_001039909 |  |  |  |
| AK096291     |  |  |  |
| BX537710     |  |  |  |
| BC041449     |  |  |  |

|              |  |  |  |
|--------------|--|--|--|
| NR_002836    |  |  |  |
| CR598129     |  |  |  |
| BC035112     |  |  |  |
| CR613732     |  |  |  |
| DQ597733     |  |  |  |
| AX747172     |  |  |  |
| AK128266     |  |  |  |
| TCAM-1       |  |  |  |
| BC050344     |  |  |  |
| BC047380     |  |  |  |
| AL832439     |  |  |  |
| BC042121     |  |  |  |
| BC041426     |  |  |  |
| C15ORF20     |  |  |  |
| AK125310     |  |  |  |
| DKFZP434P055 |  |  |  |
| KIAA0010     |  |  |  |
| COX18HS      |  |  |  |
| BC038578     |  |  |  |
| AY314748     |  |  |  |
| AK023134     |  |  |  |
| AK131313     |  |  |  |
| BC041865     |  |  |  |
| AX746851     |  |  |  |
| LOC606495    |  |  |  |
| AK127238     |  |  |  |
| LOC441282    |  |  |  |
| BOZF1        |  |  |  |
| AK026825     |  |  |  |
| AK128305     |  |  |  |
| AL713649     |  |  |  |
| DQ573949     |  |  |  |
| AK091996     |  |  |  |
| CR606964     |  |  |  |
| HSKRP1       |  |  |  |
| AX747556     |  |  |  |
| NR_003266    |  |  |  |
| CR749689     |  |  |  |
| BC049371     |  |  |  |
| AX747988     |  |  |  |
| FLJ35848     |  |  |  |
| WHDC1L1      |  |  |  |
| AK126491     |  |  |  |
| AK024841     |  |  |  |
| AX746688     |  |  |  |
| FLJ37357     |  |  |  |
| FLJ44955     |  |  |  |

|                         |  |  |  |
|-------------------------|--|--|--|
| BC040631                |  |  |  |
| CR627135                |  |  |  |
| DKFZP451M2119           |  |  |  |
| CR627206                |  |  |  |
| AK127460                |  |  |  |
| BC019672                |  |  |  |
| HERV-H-<br>HHLA1_FUSION |  |  |  |
| AK057632                |  |  |  |
| FLJ00264                |  |  |  |
| NY-REN-7                |  |  |  |
| AK125288                |  |  |  |
| AF086203                |  |  |  |
| LOC94431                |  |  |  |
| BC043415                |  |  |  |
| AK098333                |  |  |  |
| BC042588                |  |  |  |
| AX747864                |  |  |  |
| AY314747                |  |  |  |
| AK128216                |  |  |  |
| BC044257                |  |  |  |
| AX747062                |  |  |  |
| BX649144                |  |  |  |
| AL137270                |  |  |  |
| PP8961                  |  |  |  |
| AK056558                |  |  |  |
| AK094845                |  |  |  |
| AX747742                |  |  |  |
| AK095981                |  |  |  |
| CTRP6                   |  |  |  |
| NR_002821               |  |  |  |
| AX746880                |  |  |  |
| AK125817                |  |  |  |
| AK056417                |  |  |  |
| AK026469                |  |  |  |
| AK090984                |  |  |  |
| AK131520                |  |  |  |
| AL833246                |  |  |  |
| AK125832                |  |  |  |
| BC041455                |  |  |  |
| AF380582                |  |  |  |
| AX747658                |  |  |  |
| AX721193                |  |  |  |
| BC047626                |  |  |  |
| FLJ44060                |  |  |  |
| KIAA0982                |  |  |  |
| AK093513                |  |  |  |
| BC038431                |  |  |  |



|              |  |  |  |
|--------------|--|--|--|
| BX161428     |  |  |  |
| DKFZP686O248 |  |  |  |
| AK096335     |  |  |  |
| BX640887     |  |  |  |
| BC009626     |  |  |  |
| AY338954     |  |  |  |
| BC036412     |  |  |  |
| NM_001001681 |  |  |  |
| AK056892     |  |  |  |
| DQ573361     |  |  |  |
| BC041466     |  |  |  |
| NR_002210    |  |  |  |
| FLJ33706     |  |  |  |
| KIAA1767     |  |  |  |
| MBL1P1       |  |  |  |
| BC071776     |  |  |  |
| AK127888     |  |  |  |
| NR_002943    |  |  |  |
| AX747340     |  |  |  |
| LOC401252    |  |  |  |
| AX746585     |  |  |  |
| AK091594     |  |  |  |
| AK096412     |  |  |  |
| FLJ34047     |  |  |  |
| AX747756     |  |  |  |
| BC090058     |  |  |  |
| CR611653     |  |  |  |
| AL137733     |  |  |  |
| BX537706     |  |  |  |
| NR_001565    |  |  |  |
| MGC4836      |  |  |  |
| MGC29891     |  |  |  |
| AK098240     |  |  |  |
| AX748249     |  |  |  |
| C1ORF140     |  |  |  |
| AK055868     |  |  |  |
| BC122562     |  |  |  |
| BC041363     |  |  |  |
| BC047625     |  |  |  |
| BC021741     |  |  |  |
| AK056524     |  |  |  |
| BX647358     |  |  |  |
| AK023515     |  |  |  |
| AK125311     |  |  |  |
| AK123891     |  |  |  |
| LOC339809    |  |  |  |
| AK128523     |  |  |  |

|                |  |  |  |
|----------------|--|--|--|
| AK094859       |  |  |  |
| PJCG6          |  |  |  |
| AX748371       |  |  |  |
| UNQ3037        |  |  |  |
| AK054880       |  |  |  |
| AK094224       |  |  |  |
| AL833510       |  |  |  |
| KENAE1         |  |  |  |
| BC012110       |  |  |  |
| BC052779       |  |  |  |
| AK097893       |  |  |  |
| BC105727       |  |  |  |
| AK091527       |  |  |  |
| WBSCR23        |  |  |  |
| BC043378       |  |  |  |
| AK056246       |  |  |  |
| LOC401898      |  |  |  |
| AK023856       |  |  |  |
| UNQ1849        |  |  |  |
| BC048997       |  |  |  |
| FLJ36492       |  |  |  |
| KIAA2023       |  |  |  |
| AK054869       |  |  |  |
| CR749689       |  |  |  |
| BC029555       |  |  |  |
| AK024378       |  |  |  |
| NR_002821      |  |  |  |
| DKFZP686F19123 |  |  |  |

**Table S6: Categorization of annotated satellite correlated genes**

Satellite correlated genes were classified the using DAVID gene ontology program. Shown are the total numbers of genes in the neural, germ/stem cell, and zinc finger categories. Percentage of total genes mapped by the DAVID gene ontology program shown in parentheses.

|                   | <b>Neural</b> | <b>Germ/Stem Cell</b> | <b>Zinc Finger Domain</b> |
|-------------------|---------------|-----------------------|---------------------------|
| <b>Mouse SCGs</b> | 120 (63%)     | 50 (26%)              | 16 (8%)                   |
| <b>Human SCGs</b> | 101 (49%)     | 63 (31%)              | 35 (17%)                  |

**Table S7: Analysis of neuroendocrine markers in human PDAC with high and low ALR satellite levels.** Human PDACs were split into low and high total satellite expression using the median satellite expression. Average expression of each gene in low and high satellite human pancreatic tumors shown. Fold change and t-test q-value between high and low satellite PDAC samples is shown. Positive fold change indicates expression higher in high satellite PDAC while negative fold change indicates expression higher in low satellite PDAC.

| <b>Human Gene Symbol</b> | <b>Human Gene Name</b> | <b>AVERAGE EXPRESSION (tpm)</b> |                      | <b>FOLD</b> | <b>q-value (FDR)</b> |
|--------------------------|------------------------|---------------------------------|----------------------|-------------|----------------------|
|                          |                        | <b>PDAC LOW ALR</b>             | <b>PDAC HIGH ALR</b> |             |                      |
| SVOP                     | SV2 related            | 15.60                           | 58.11                | 3.73        | 0.015                |
| SYN2                     | Synapsin 2             | 5.96                            | 18.17                | 3.05        | 0.015                |
| CHGB                     | Chromagranin B         | 2.95                            | 10.08                | 3.41        | 0.272                |
| SYN1                     | Synapsin 1             | 1.16                            | 3.20                 | 2.76        | 0.272                |
| SCG2                     | Chromagranin C         | 3.10                            | 8.93                 | 2.88        | 0.272                |
| SLC6A4                   | Serotonin              | 1.27                            | 3.81                 | 3.00        | 0.284                |
| VAMP1                    | Synaptobrevin          | 15.73                           | 21.32                | 1.35        | 0.424                |
| NCAM1                    | CD56                   | 52.74                           | 21.25                | -2.48       | 0.424                |
| ASCL1                    | ASCL1                  | 20.58                           | 14.12                | -1.46       | 0.536                |
| ENO2                     | NSE                    | 40.82                           | 33.51                | -1.22       | 0.536                |
| CHGA                     | Chromagranin A         | 11.97                           | 9.19                 | -1.30       | 0.563                |
| SYP                      | Synaptophysin          | 27.92                           | 25.61                | -1.09       | 0.563                |

**Table S8: List of candidate histone modifiers evaluated in mouse and human samples with high and low satellite levels.** A list of histone modifiers was compiled from three recent reviews of epigenetic modifiers (S9-S11).

| Count | Human Gene Name | Mouse Gene Name | Other Name | FUNC              | Reference |
|-------|-----------------|-----------------|------------|-------------------|-----------|
| 1     | CLOCK           | Clock           | KAT13D     | Acetyltransferase | 1         |
| 2     | CREBBP          | Crebbp          | KAT3A      | Acetyltransferase | 1         |
| 3     | ELP3            | Elp3            | KAT9       | Acetyltransferase | 1         |
| 4     | EP300           | Ep300           | KAT3B      | Acetyltransferase | 1         |
| 5     | Gtf3c4          | Gtf3c4          | KAT12      | Acetyltransferase | 1         |
| 6     | HAT1            | Hat1            | KAT1       | Acetyltransferase | 1         |
| 7     | GCN5L2          | Kat2a           | KAT2A      | Acetyltransferase | 1         |
| 8     | PCAF            | Kat2b           | KAT2B      | Acetyltransferase | 1         |
| 9     | HTATIP          | Kat5            | KAT5       | Acetyltransferase | 1         |
| 10    | MYBBP1A         | Mybbp1a         | KAT13C     | Acetyltransferase | 1         |
| 11    | Myst1           | Myst1           | KAT8       | Acetyltransferase | 1         |
| 12    | Myst2           | Myst2           | KAT7       | Acetyltransferase | 1         |
| 13    | Myst3           | Myst3           | KAT6A      | Acetyltransferase | 1         |
| 14    | Myst4           | Myst4           | KAT6B      | Acetyltransferase | 1         |
| 15    | NCOA1           | Ncoa1           | KAT13A     | Acetyltransferase | 1         |
| 16    | NCOA3           | Ncoa3           | KAT13B     | Acetyltransferase | 1         |
| 17    | TAF1            | Taf1            | KAT4       | Acetyltransferase | 1         |
| 18    | EGLN1           | Egln1           |            | Demethylase       | 2         |
| 19    | EGLN2           | Egln2           |            | Demethylase       | 2         |
| 20    | EGLN3           | Egln3           |            | Demethylase       | 2         |
| 21    | HIF1AN          | Hif1an          |            | Demethylase       | 2         |
| 22    | HR              | Hr              |            | Demethylase       | 2         |
| 23    | HSPBAP1         | Hspbap1         |            | Demethylase       | 2         |
| 24    | JARID2          | Jarid2          |            | Demethylase       | 2         |
| 25    | JHDM1D          | Jhdm1d          |            | Demethylase       | 2         |
| 26    | JMJD1C          | Jmjd1c          |            | Demethylase       | 2         |
| 27    | JMJD4           | Jmjd4           |            | Demethylase       | 2         |
| 28    | JMJD6           | Jmjd6           |            | Demethylase       | 2         |
| 29    | LOC339123       | Jmjd8           |            | Demethylase       | 2         |
| 30    | LSD             | Kdm1            | LSD1       | Demethylase       | 2         |
| 31    | FBXL11          | Kdm2a           |            | Demethylase       | 2         |
| 32    | FBXL10          | Kdm2b           |            | Demethylase       | 2         |
| 33    | JMJD1A          | Kdm3a           |            | Demethylase       | 2         |
| 34    | JMJD1B          | Kdm3b           |            | Demethylase       | 2         |
| 35    | JMJD2A          | Kdm4a           |            | Demethylase       | 2         |
| 36    | JMJD2B          | Kdm4b           |            | Demethylase       | 2         |
| 37    | JMJD2C          | Kdm4c           |            | Demethylase       | 2         |
| 38    | JMJD2D          | Kdm4d           |            | Demethylase       | 2         |
| 39    | JARID1B         | Kdm5b           | PLU1       | Demethylase       | 2         |
| 40    | JARID1C         | Kdm5c           | SMCX       | Demethylase       | 2         |
| 41    | JARID1D         | Kdm5d           | SMCY       | Demethylase       | 2         |
| 42    | UTX             | Kdm6a           |            | Demethylase       | 2         |

|    |          |         |         |                   |   |
|----|----------|---------|---------|-------------------|---|
| 43 | JMJD3    | Kdm6b   |         | Demethylase       | 2 |
| 44 | PHF2     | Phf2    |         | Demethylase       | 2 |
| 45 | PHF8     | Phf8    |         | Demethylase       | 2 |
| 46 | PLA2G4B  | Pla2g4b |         | Demethylase       | 2 |
| 47 | HDAC1    | Hdac1   |         | HDAC              | 2 |
| 48 | HDAC10   | Hdac10  |         | HDAC              | 2 |
| 49 | HDAC11   | Hdac11  |         | HDAC              | 2 |
| 50 | HDAC2    | Hdac2   |         | HDAC              | 2 |
| 51 | HDAC3    | Hdac3   |         | HDAC              | 2 |
| 52 | HDAC4    | Hdac4   |         | HDAC              | 2 |
| 53 | HDAC5    | Hdac5   |         | HDAC              | 2 |
| 54 | HDAC6    | Hdac6   |         | HDAC              | 2 |
| 55 | HDAC7A   | Hdac7   |         | HDAC              | 2 |
| 56 | HDAC8    | Hdac8   |         | HDAC              | 2 |
| 57 | HDAC9    | Hdac9   |         | HDAC              | 2 |
| 58 | ASH1L    | Ash1l   |         | Methyltransferase | 3 |
| 59 | EHMT1    | Ehmt1   | GLP1    | Methyltransferase | 3 |
| 60 | EHMT2    | Ehmt2   | G9a     | Methyltransferase | 3 |
| 61 | EZH1     | Ezh1    |         | Methyltransferase | 3 |
| 62 | EZH2     | Ezh2    |         | Methyltransferase | 3 |
| 63 | MDS1     | Mds1    | PRDM3   | Methyltransferase | 3 |
| 64 | MLL      | Mll1    | ALL-1   | Methyltransferase | 3 |
| 65 | MLL2     | Mll2    |         | Methyltransferase | 3 |
| 66 | MLL3     | Mll3    |         | Methyltransferase | 3 |
| 67 | MLL5     | Mll5    | KMT2E   | Methyltransferase | 3 |
| 68 | NSD1     | Nsd1    |         | Methyltransferase | 3 |
| 69 | PRDM1    | Prdm1   |         | Methyltransferase | 3 |
| 70 | PRDM13   | Prdm13  |         | Methyltransferase | 3 |
| 71 | PRDM14   | Prdm14  |         | Methyltransferase | 3 |
| 72 | PRDM15   | Prdm15  |         | Methyltransferase | 3 |
| 73 | PRDM16   | Prdm16  |         | Methyltransferase | 3 |
| 74 | PRDM2    | Prdm2   |         | Methyltransferase | 3 |
| 75 | PRDM5    | Prdm5   |         | Methyltransferase | 3 |
| 76 | PRDM6    | Prdm6   |         | Methyltransferase | 3 |
| 77 | PRDM8    | Prdm8   |         | Methyltransferase | 3 |
| 78 | PRDM9    | Prdm9   |         | Methyltransferase | 3 |
| 79 | KIAA0339 | Setd1a  | SET1A   | Methyltransferase | 3 |
| 80 | KIAA1076 | Setd1b  | SET1B   | Methyltransferase | 3 |
| 81 | SETD2    | Setd2   | HYPB    | Methyltransferase | 3 |
| 82 | SETD3    | Setd3   |         | Methyltransferase | 3 |
| 83 | SETD6    | Setd6   |         | Methyltransferase | 3 |
| 84 | SETD8    | Setd8   | PR-SET7 | Methyltransferase | 3 |
| 85 | SETDB1   | Setdb1  | ESET    | Methyltransferase | 3 |
| 86 | SETDB2   | Setdb2  | CLL8    | Methyltransferase | 3 |
| 87 | SETMAR   | Setmar  |         | Methyltransferase | 3 |
| 88 | SMYD1    | Smyd1   |         | Methyltransferase | 3 |
| 89 | SMYD2    | Smyd2   |         | Methyltransferase | 3 |
| 90 | SMYD3    | Smyd3   |         | Methyltransferase | 3 |
| 91 | SMYD4    | Smyd4   |         | Methyltransferase | 3 |

|    |          |          |      |                   |   |
|----|----------|----------|------|-------------------|---|
| 92 | SMYD5    | Smyd5    |      | Methyltransferase | 3 |
| 93 | SUV39H1  | Suv39h1  |      | Methyltransferase | 3 |
| 94 | SUV39H2  | Suv39h2  |      | Methyltransferase | 3 |
| 95 | SUV420H1 | Suv420h1 |      | Methyltransferase | 3 |
| 96 | SUV420H2 | Suv420h2 |      | Methyltransferase | 3 |
| 97 | MLL4     | Wbp7     | MLL4 | Methyltransferase | 3 |
| 98 | WHSC1    | Whsc1    | NSD2 | Methyltransferase | 3 |
| 99 | WHSC1L1  | Whsc1l1  | NSD3 | Methyltransferase | 3 |

**Table S9: List of candidate histone modifiers evaluated in mouse PDAC tumors with high and low satellite levels.** Mouse PDACs were split into low and high satellite expression using the median satellite expression. Average expression of each gene in low and high satellite mouse pancreatic tumors shown. Fold change and t-test q-value between high and low satellite PDAC samples is shown. Positive fold change indicates expression higher in high satellite PDAC while negative fold change indicates expression higher in low satellite PDAC.

| Mouse Gene Name | Function          | AVERAGE EXPRESSION (tpm) |               | FOLD  | q-value (FDR) |
|-----------------|-------------------|--------------------------|---------------|-------|---------------|
|                 |                   | PDAC LOW SAT             | PDAC HIGH SAT |       |               |
| Hspbap1         | Demethylase       | 20.5                     | 104.8         | 5.11  | 0.019         |
| Kdm3b           | Demethylase       | 73.7                     | 34.2          | -2.16 | 0.020         |
| Myst4           | Acetyltransferase | 35.7                     | 92.2          | 2.58  | 0.021         |
| Jmjd4           | Demethylase       | 3.9                      | 12.1          | 3.10  | 0.021         |
| Hdac9           | HDAC              | 26.7                     | 115.9         | 4.34  | 0.021         |
| Kdm5d           | Demethylase       | 9.7                      | 95.2          | 9.84  | 0.021         |
| Kdm6b           | Demethylase       | 51.3                     | 83.4          | 1.62  | 0.057         |
| Hdac3           | HDAC              | 121.7                    | 57.2          | -2.13 | 0.057         |
| Hdac4           | HDAC              | 33.1                     | 16.6          | -2.00 | 0.057         |

**Table S10: List of candidate histone modifiers evaluated in human PDAC tumors with high and low satellite levels.** Human PDACs were split into low and high total satellite expression using the median ALR satellite expression. Average expression of each gene in low and high satellite human pancreatic tumors shown. Fold change and t-test q-value between high and low satellite PDAC samples is shown. Positive fold change indicates expression higher in high satellite PDAC while negative fold change indicates expression higher in low satellite PDAC.

| Human Gene Name | Function          | AVERAGE EXPRESSION (tpm) |               | FOLD | q-value (FDR) |
|-----------------|-------------------|--------------------------|---------------|------|---------------|
|                 |                   | PDAC LOW ALR             | PDAC HIGH ALR |      |               |
| SETMAR          | Methyltransferase | 12.6                     | 35.3          | 2.8  | 0.057         |
| SMYD4           | Methyltransferase | 143.7                    | 339.7         | 2.4  | 0.057         |
| PRDM6           | Methyltransferase | 1.9                      | 5.9           | 3.1  | 0.057         |
| SMYD1           | Methyltransferase | 3.3                      | 12.6          | 3.8  | 0.057         |

## SUPPLEMENTARY ONLINE MATERIALS REFERENCES

- S1. N. Bardeesy *et al.*, *Proc Natl Acad Sci U S A* **103**, 5947 (2006).
- S2. A. J. Aguirre *et al.*, *Genes Dev* **17**, 3112 (2003).
- S3. D. Lipson *et al.*, *Nat Biotechnol* **27**, 652 (2009).
- S4. D. Pushkarev, N. F. Neff, S. R. Quake, *Nat Biotech* **27**, 847 (2009).
- S5. J. Jurka *et al.*, *Cytogenet Genome Res* **110**, 462 (2005).
- S6. G. Dennis, Jr. *et al.*, *Genome Biol* **4**, P3 (2003).
- S7. W. Huang da, B. T. Sherman, R. A. Lempicki, *Nat Protoc* **4**, 44 (2009).
- S8. J. D. Storey, R. Tibshirani, *Methods Mol Biol* **224**, 149 (2003).
- S9. M. Albert, K. Helin, *Semin Cell Dev Biol* **21**, 209 (2010).
- S10. C. D. Allis *et al.*, *Cell* **131**, 633 (2007).
- S11. P. A. Cloos, J. Christensen, K. Agger, K. Helin, *Genes Dev* **22**, 1115 (2008).
- S12. F. Li, L. Sonbuchner, S. A. Kyes, C. Epp, K. W. Deitsch, *J Biol Chem* **283**, 5692 (2008).
- S13. J. H. Martens *et al.*, *EMBO J* **24**, 800 (2005).
